# Supplementary material for: Interfacial Charge Transfer in MoS2/TiO2 Heterostructured Photocatalysts: The Impact of Crystal Facets and Defects
Source: MDPI journal article supplement (doi:10.3390/molecules24091769), 2019-05-07
Supplement: s1 [file s1]

Article

# Interfacial Charge Transfer in MoS<sub>2</sub>/TiO<sub>2</sub> Heterostructured Photocatalysts: the Impact of Crystal Facets and Defects

Tingcha Wei <sup>1</sup>, Woon Ming Lau <sup>2,\*</sup>, Xiaoqiang An <sup>3,\*</sup> and Xuelian Yu <sup>4</sup>

<sup>1</sup> Beijing Computational Science Research Center, Beijing 100193, China; wtc@csrc.ac.cn

<sup>2</sup> Center for Green Innovation, School of Mathematics and Physics, University of Science & Technology Beijing, Beijing 100083, China.

<sup>3</sup> Center for Water and Ecology, State Key Joint Laboratory of Environment Simulation and Pollution Control, School of Environment, Tsinghua University, Beijing 100084, China.

<sup>4</sup> Beijing Key Laboratory of Materials Utilization of Nonmetallic Minerals and Solid Wastes, National Laboratory of Mineral Materials, School of Materials Science and Technology, China University of Geosciences, Beijing 100083, China; xlyu@cugb.edu.cn

\* Correspondence: leolau@ustb.edu.cn (W.M.L.); xqan@tsinghua.edu.cn (X.A.)

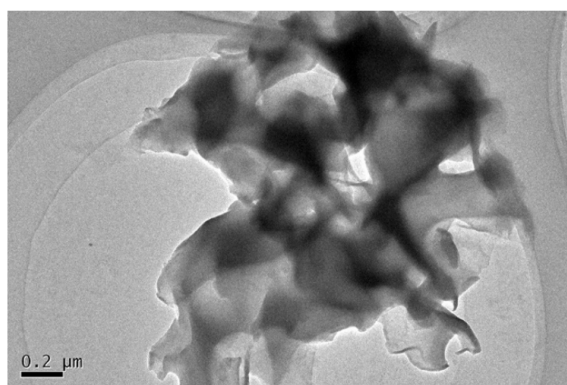

**Fig. S1.** TEM image of commercial MoS<sub>2</sub> nanosheets.

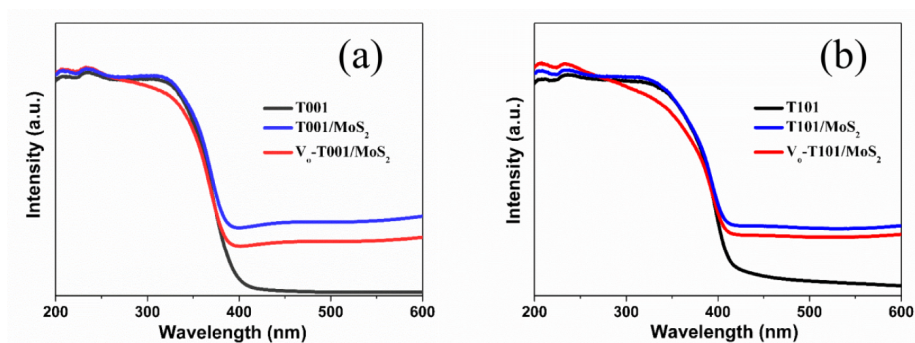

**Fig. S2.** UV-vis diffuse reflectance spectra of {001}-faceted TiO<sub>2</sub> (a) and {101}-faceted TiO<sub>2</sub> (b) before and after the deposition of MoS<sub>2</sub> with and without defect.

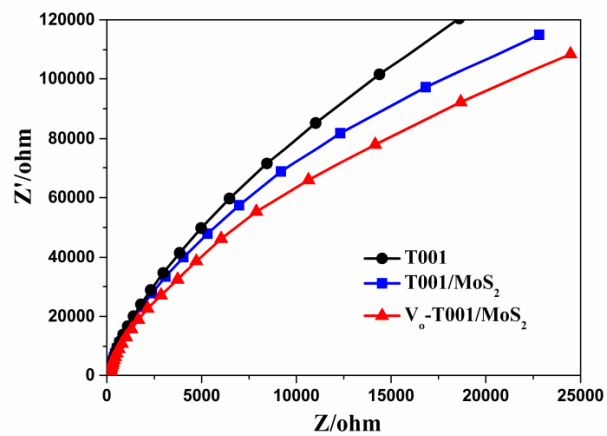

**Fig. S3.** EIS plots of {001}-faceted TiO<sub>2</sub> before and after the deposition of MoS<sub>2</sub> with and without defect.
